1  
2  
3  
4  
5  
6  
7  
8  
9  
10  
11  
12  
13  
14  
15  
16  
17  
18  
19  
20  
21  
22  
23  
24

## **Endpoint and Epitope-specific Antibody Responses as Correlates of Vaccine-mediated Protection of Mice against Ricin Toxin**

Greta Van Slyke<sup>1,†</sup>, Dylan J Ehrbar<sup>1,†</sup>, Jennifer Doering<sup>1</sup>, Jennifer L. Yates<sup>1</sup>, Ellen S. Vitetta<sup>2</sup>,  
Oreola Donini<sup>3</sup>, and Nicholas J Mantis<sup>1,\*</sup>

<sup>1</sup>Division of Infectious Disease, Wadsworth Center, New York State Department of Health, Albany, NY 12208; <sup>2</sup>Department of Immunology and Microbiology, University of Texas Southwestern Medical School, Dallas, TX; <sup>3</sup>Soligenix, Inc., Princeton, NJ, 08540

\*Corresponding Author: Division of Infectious Disease, Wadsworth Center, 120 New Scotland Avenue, Albany, NY 12208 Phone: 518-473-7487; Email: [nicholas.mantis@health.ny.gov](mailto:nicholas.mantis@health.ny.gov)

<sup>†</sup>, These authors contributed equally to this work.

## ABSTRACT

The successful licensure of vaccines for biodefense is contingent upon the availability of well-established correlates of protection (CoP) in at least two animal species that can then be applied to humans, without the need to assess efficacy in the clinic. In this report we describe a multivariate model that combines pre-challenge serum antibody endpoint titers (EPT) and values derived from an epitope profiling immune-competition capture (EPICC) assay as a predictor in mice of vaccine-mediated immunity against ricin toxin (RT), a Category B biothreat. EPICC is a modified competition ELISA in which serum samples from vaccinated mice were assessed for their ability to inhibit the capture of soluble, biotinylated (b)-RT by a panel of immobilized monoclonal antibodies (mAbs) directed against four immunodominant toxin-neutralizing regions on the enzymatic A chain (RTA) of RT. In a test cohort of mice (n=40) vaccinated with suboptimal doses of the RTA subunit vaccine, RiVax<sup>®</sup>, we identified two mAbs, PB10 and SyH7, which had EPICC inhibition values in pre-challenge serum samples that correlated with survival following a challenge with 10 x LD<sub>50</sub> of RT administered by intraperitoneal (IP) injection. Analysis of a larger cohort of mice (n=645) revealed that a multivariate model combining endpoint titers and an epitope-profiling immune-competition capture (EPICC) assay values for PB10 and SyH7 as predictive variables had significantly higher statistical power than any one of the independent variables alone. Establishing the correlates of vaccine-mediated protection in mice represents an important steppingstone in the development of RiVax<sup>®</sup> as a medical countermeasure under the United States Food and Drug Administration's "Two Animal Rule."

**Keywords:** ricin; mouse; antibody; neutralizing; epitope; vaccine; biodefense

**Abbreviations:** Enzyme-linked immunosorbent assay (ELISA), epitope profiling immune-competition capture (EPICC); Monoclonal antibody (mAb); biotinylated (b), ricin toxin (RT), RT A chain (RTA)

52

## 53 **1. Introduction**

54 The development of vaccines to counteract biothreats, including toxins, remains a high  
55 priority in many countries, including the United States [1, 2]. There are, however, formidable  
56 challenges to development and licensure [3]. Foremost is the need to assess vaccine efficacy  
57 (VE) in humans in the absence of clinical outcomes, because conventional efficacy studies are  
58 not ethical and field trials are not feasible for most if not all the Category A and B Biothreats.  
59 Under the Two Animal Rule, however, the United States Food and Drug Administration (FDA)  
60 will evaluate VE based on “adequate and well-controlled studies in animal models of the human  
61 disease or condition of interest” [4]. Of utmost importance are well-established and robust  
62 correlates of protection (CoP) that apply across species and and can be applied to humans. The  
63 undertaking of cross-species bridging studies has been successfully applied to anthrax vaccine  
64 adsorbed (AVA) to estimate survival probabilities in vaccinated human populations [5].

65 RT is classified by the Centers for Disease Control and Prevention (CDC) as a Category  
66 B biothreat, due to its extreme toxicity and ease by which it can be procured from castor beans  
67 (*Ricinus communis*), which are cultivated globally for industrial and cosmetic applications. In its  
68 mature form, RT is a ~65 kDa heterodimeric glycoprotein consisting of an RNA N-glycosidase  
69 (RTA) joined by a disulfide to galactose/N-acetyl galactosamine (Gal/GalNAc)-specific lectin  
70 (RTB). RTB facilitates ricin endocytosis and retrograde transport from the plasma membrane to  
71 the endoplasmic reticulum (ER). Within the ER, RTA is released from RTB and retro-  
72 translocated into the cytoplasm, where it functions as a ribosome-inactivating protein (RIP) by  
73 depurinating a single residue in the sarcin-ricin loop (SRL) of 28S rRNA [6]. On the cellular  
74 level, ribosome arrest triggers the ribotoxic-stress response (RSR) and activates stress-activated  
75 protein kinase (SAPK) and programmed cell death (PCD) pathways [7]. The lethality of RT in  
76 animals translates into a multifaceted pathophysiology initiated by cellular damage and driven by  
77 inflammatory cytokines and death.

78 Historically, there are two advanced RTA-based subunit vaccines in development as a  
79 medical countermeasures (MCM) for RT intoxication, RVEc and RiVax<sup>®</sup> [8-10]. RVEc is a  
80 truncated version of RTA that lacks the molecule’s C-terminal folding domain (residues 199-  
81 267), as well as a small hydrophobic loop in the N-terminus (residues 34-43) [11-13]. RVEc was  
82 under development by the Department of Defense [8]. RiVax<sup>®</sup> and is a full-length variant (267

83 residues) of RTA with point mutations at position Y80 to disrupt RTA's RNA N-glycosidase  
84 activity and V76 that eliminates RTA's ability to induce vascular leak syndrome (VLS) [14-16].  
85 Pilot phase I clinical trials have indicated that both RVEc- and RiVax<sup>®</sup>-adsorbed to aluminum  
86 salt adjuvants are safe and immunogenic in healthy adults [8, 10]. Moreover, the efficacy of the  
87 two vaccines has been demonstrated in animal models, including mice, and non-human primates  
88 (NHPs) [16-19]. In the case of RiVax<sup>®</sup>, for example, Rhesus macaques vaccinated three times by  
89 the intramuscular (IM) route at monthly intervals were immune to 3 x LD<sub>50</sub> or aerosolized RT  
90 [18]. In mice, RiVax<sup>®</sup> vaccination by intramuscular (IM), intraperitoneal (IP), subcutaneous (SC)  
91 and intradermal (ID) protects against hyper-lethal doses of RT administered by inhalation,  
92 gavage, or injection [19-22].

93 Despite the demonstrated pre-clinical efficacy of RiVax<sup>®</sup> and RVEc, a CoP for RT has  
94 not been formally established. Toxin-neutralizing antibody (TNA) titers are an obvious metric  
95 and are used as the universal standard in assessing immunity to tetanus and diphtheria toxins [23,  
96 24]. Unfortunately, in the case of RT, TNA assays are insensitive, difficult to standardize, and of  
97 limited relevance to the primary cell types affected by RT *in vivo* (e.g., alveolar macrophages,  
98 Kupffer cells) [19]. However, it was reported that in a cohort of ~300 mice vaccinated with  
99 RiVax<sup>®</sup> by the intradermal (ID) or intramuscular (IM) routes that animals that survived lethal  
100 dose RT challenge had significantly higher RTA-specific serum IgG titers than those that died  
101 [25]. Other reports have noted a similar association [19, 22] but none have rigorously evaluated  
102 whether pre-challenge endpoint titers (EPT) are in fact predictive of survival.

103 In a recent study we raised the possibility that toxin-neutralizing, epitope-specific serum  
104 IgG titers might serve as a relative correlate of protection [22]. In the case of RT there is  
105 considerable evidence that toxin-neutralizing antibodies constitute only a fraction of the total  
106 antibody pool elicited following RiVax<sup>®</sup> vaccination and that neutralizing antibodies target a  
107 limited number of immunodominant epitopes on RTA, referred to as epitope clusters I-IV [26].  
108 In the past several years, we have amassed a collection of mAbs and camelid-derived single  
109 chain antibodies (V<sub>H</sub>Hs) against RTA that we have started to use as tools to investigate the  
110 polyclonal response elicited by RiVax<sup>®</sup> antisera [18, 22, 26, 27]. Although we do not yet have a  
111 full understanding of the relative importance of epitope-specific antibodies in contributing to  
112 vaccine-induced immunity, passive protection studies in mice and NHP have indicated that

113 single mAbs or combinations of mAbs are sufficient to afford immunity to levels similar to those  
114 achieved through active vaccination [28-31].

115 In this report, we explored EPT as well as values derived from an epitope profiling  
116 immune-competition capture (EPICC) assay as possible correlates of vaccine-mediated  
117 protection of mice against a lethal RT challenge dose by IP injection. The results demonstrate  
118 that EPT and EPICC values each afforded significant power in predicting survival, but that a  
119 multivariate model combining both metrics (i.e., EPT and EPICC values) improved  
120 predictability. The EPICC assay has the benefit to being species neutral and therefore potentially  
121 applicable across species as a possible co-correlate of immunity to RT.

122

## 123 **2. Material and Methods**

### 124 *2.1 Chemicals and biological reagents.*

125 RT; *Ricinus communis* agglutinin II; RCA<sub>60</sub>) and biotin (b)-RT were purchased from  
126 Vector Laboratories (Burlingame, CA). A thermostable batch of RiVax<sup>®</sup> was provided by  
127 Soligenix, Inc (Princeton, NJ), as described [18]. The murine mAbs used in this study were  
128 affinity purified from serum-free hybridoma supernatants using protein G chromatography at the  
129 Dana Farber Cancer Institute Monoclonal Antibody Core facility (Boston, MA). Unless noted  
130 otherwise, chemicals were obtained from the Sigma-Aldrich Company (St. Louis, MO).

131

### 132 *2.2 Mouse vaccination and RT challenge studies.*

133 Mouse experiments were conducted in strict accordance with protocol #18-384 approved  
134 by the Wadsworth Center's Institutional Animal Care and Use Committee (IACUC). The  
135 Wadsworth Center is an American Association for Laboratory Animal Science (AALAS)  
136 accredited institution. Female BALB/c mice (IMSR Cat# TAC:balb, RRID:IMSR\_TAC:balb; 8-  
137 12-week old) were purchased from Taconic Biosciences (Rensselaer, NY) and housed at the  
138 Wadsworth Center under conventional specific pathogen-free conditions. Mouse vaccinations  
139 and RT challenges were carried out as reported previously [22]. Mice were immunized with  
140 RiVax<sup>®</sup> (0.3, 1 or 3 µg) administered SC on days 0 (prime) and 21 (boost) [22]. Sera were  
141 harvested by submandibular bleeding on day 30. Mice were challenged by IP injection with 5 x  
142 LD<sub>50</sub> RT (~1 µg/mouse; 10 µg/kg) on study day 35 and monitored for 7 days thereafter for  
143 morbidity and weight loss.

144

145 *2.3 ELISA.*

146 Indirect and competitive capture ELISAs were performed as described [22]. Nunc  
147 Maxisorb F96 microtiter plates (Thermo Scientific, Pittsburgh, PA) were coated with RT (1  
148  $\mu\text{g/ml}$  in PBS, pH 7.4) overnight at 4°C. The plates were blocked with phosphate buffered saline  
149 (PBS) containing goat serum (2% v/v; Gibco, Grand Island, NY) and Tween-20 (0.1% v/v).  
150 Serum samples were serially (1:2) diluted in blocking solution. Horseradish peroxidase (HRP)-  
151 labeled goat anti-mouse IgG polyclonal antibodies (SouthernBiotech, Birmingham, AL) were  
152 used as secondary antibodies. TMB (3,3',5,5'-tetramethylbenzidine; Kirkegaard & Perry Labs,  
153 Gaithersburg, MD) was used as colorimetric detection substrate and reactions were stopped with  
154 1 N phosphoric acid. Plates were read on a SpectroMax 250 spectrophotometer and analyzed  
155 with Softmax Pro 5.4.5 software (Molecular Devices, Sunnyvale, CA). End-point titers were  
156 defined as the dilution where absorbance >3-times above the background (*e.g.*, blank wells).  
157 Seroconversion was defined as an endpoint titer in a RT ELISA of  $\geq 1:50$ . Geometric mean  
158 titers (GMTs) were calculated from the endpoint titers. Mice that had not seroconverted, as  
159 determined by ELISA, were assigned a GMT of 1 for the purposes of statistical analysis.

160

161 *2.3 Epitope profiling immune-competition capture (EPICC) assay.*

162 Immulon 4HBX 96-well microtiter plates (Thermo Scientific) were coated with indicated  
163 anti-RTA mAbs (1  $\mu\text{g/ml}$  in 0.1 mL) in PBS, pH 7.4 at room temperature for 1 h and then  
164 blocked overnight at 4°C, as noted above. For EPICC, the amount of b-RT used in the assay was  
165 adjusted to the EC<sub>90</sub> for each MAb (30-200 ng/ml) [32], as shown in **Table 1**. Serial dilutions of  
166 control or immune sera were mixed with b-RT (EC<sub>90</sub>) in duplicate in PVC microtiter plates,  
167 incubated for 15 min and then transferred using a multichannel pipette to Immulon 4HBX 96-  
168 well microtiter plates (Thermo Scientific) coated with indicated anti-RTA mAbs (1  $\mu\text{g/ml}$  in 0.1  
169 mL). in PBS, pH 7.4 at room temperature for 1 h and then blocked overnight at 4°C, as noted  
170 above. As controls, each mAb (10  $\mu\text{g/ml}$ ) was competed with itself to establish a 100%  
171 inhibitory baseline. The microtiter plates were incubated at RT for 1 h, washed and then probed  
172 with streptavidin-HRP (1  $\mu\text{g/ml}$ ; Thermo Scientific) and developed with 3,3',5,5'-  
173 Tetramethylbenzidine (TMB) (Kirkegaard & Perry Labs). Plates were analyzed with a  
174 SpectroMax 250 spectrophotometer using Softmax Pro 5.2 software (Molecular Devices).

175 Inhibition of RT binding was calculated as a percentage of b-RT binding to the coated MAb,  
176 where:  $[100 - (OD_{450C} / OD_{450B}) * 100] = \% \text{ RT binding inhibited by competitor}$ , and  $C =$  competed  
177 well,  $B =$  b-R (EC<sub>90</sub>). Pooled sera from RiVax-vaccinated rabbits and Rhesus macaques [18]  
178 were diluted in PBS prior to use for EPICC analysis.

179

### 180 *2.3 Statistical analysis.*

181 Endpoint titers were log-transformed prior to statistical analysis. Endpoint titers were  
182 compared using one-way analysis of variance (ANOVA) followed by Dunnett's multiple  
183 comparison test. Survival data were tested using the log rank Mantel-Cox test. In all cases the  
184 significance threshold was set at  $P < 0.05$ . ANOVA and log rank tests were performed using  
185 GraphPad Prism v. 8.0 for Windows (GraphPad Software, San Diego, CA, USA).

186 Correlations between endpoint titers or EPICC values and mouse survival following  
187 challenge with RT were determined by simple logistic regression. In the initial cohort of 40  
188 mice, the optimal set of predictive variables was defined using least absolute shrinkage and  
189 selection operator (LASSO) penalized logistic regression [33]. Ten-fold cross-validation was  
190 performed 10 times to select the optimal values for the  $\lambda$  penalty parameter. All sets of values for  
191 each separate potential correlate of protection were standardized to a mean of 0 and a standard  
192 deviation of 1 before LASSO regression. The selected variables were then measured in the mice  
193 included in subsequent experiments and included in analysis of the larger dataset of 645 mice.

194 The predictive performance of each model constructed from the larger dataset was  
195 assessed by receiver operating characteristic (ROC) analysis, which allowed us to examine the  
196 trade-off between sensitivity and specificity along the entire range of values for each variable.  
197 The area under the curve (AUC) was also used as a measure of the predictive value of each  
198 variable, while Delong's test was used to compare the AUC of each model [34]. P-values  
199 resulting from Delong's test were adjusted for multiple comparisons with the Holm-Sidak  
200 method. Analyses were performed in R 3.4.2 [35], the R package pROC for ROC analysis [36],  
201 and the R package glmnet for LASSO penalized logistic regression [37].

202

## 203 **3. Results**

204 *3.1 Probing RiVax<sup>®</sup> with mAbs directed against four spatially distinct toxin-neutralizing epitope*  
205 *clusters.*

206 We previously described four spatially distinct immunodominant B cell epitope clusters  
207 (I-IV) on RiVax<sup>®</sup> [26, 27, 38]. Each cluster is defined by one or more RT-neutralizing mAbs  
208 (**Table 1**). Cluster I, defined by PB10, is focused around RTA's  $\alpha$ -helix B (residues 94-107), a  
209 protruding element previously known to be a target of potent RT-neutralizing antibodies [39,  
210 40]. Cluster II, defined by SyH7 and PA1, is located on the back side of RTA, relative to the  
211 active site pocket [26]. Cluster III is targeted by MAb IB2 and is in close proximity to RTA's  
212 active site [41]. Finally, Cluster IV, defined by GD12, forms a diagonal sash from the front to  
213 back of the subunit. We previously reported that antisera from NHPs and humans vaccinated  
214 with RiVax<sup>®</sup> competes with mAbs from cluster I (PB10) and cluster II (SyH7, PA1) for binding  
215 to RT [18].

216 We performed cross-competition capture ELISAs with each of the eight representative  
217 mAbs as confirmation that the four epitope clusters are spatially distinct (**Table 1**). In this  
218 modified capture ELISA, microtiter plates were coated with individual mAbs and probed with  
219 soluble b- RT, in the absence or presence of a competitor mAb. A reduction in the capture of  
220 soluble b-RT in the presence of a competitor was interpreted as epitope overlap or steric  
221 hindrance [42]. We refer to this modified competition ELISA as EPICC.

222 As shown in **Figure 1**, there was across the board intra-cluster competition, with only  
223 limited inter-cluster competition. For example, cluster II mAbs, SyH7, PA1, PH12 and TB12,  
224 competed with each other, but not with mAbs in clusters I, III, or IV. Similarly, IB2 (cluster III)  
225 competed with itself but not with the other seven mAbs. The exception was competition between  
226 GD12 (cluster IV), and two cluster I mAbs, PB10 and R70. This cross-cluster competition (I  
227 versus III) is attributed to the contact of GD12 with the  $\alpha$ -helix B [26]. JD4, the other cluster IV  
228 mAb in our collection, did not compete with PB10 or R70. These results demonstrate our ability  
229 to "interrogate" specific immunodominant epitope clusters on RiVax<sup>®</sup> by competition ELISA.

230 To examine whether the epitope-specific antibodies against the 4 clusters identified in  
231 mice are also present in other species, we performed EPICC analysis with pooled immune sera  
232 from rabbits and Rhesus macaques<sup>™</sup> that had been vaccinated with RiVax<sup>™</sup>. As shown in **Figure**  
233 **2**, pooled sera from all three species competed with the murine mAbs representing clusters I  
234 (PB10, WECEB2), II (PA1, SyH7, PH12, TB12), III (IB2), and IV (GD12). These results  
235 demonstrate that the four immunodominant epitope clusters on RTA identified in mice are also  
236 targets of antibodies in other species.



237

### 238 *3.2 Preliminary analysis of EPT and EPICC values as correlates of vaccine-mediated protection.*

239 We next investigated the relative importance of RT-specific serum IgG titers and EPICC  
240 values as predictors of survival following a lethal injection of RT. To generate a preliminary  
241 data set, a group of 40 mice were divided into two cohorts and vaccinated SC on days 0 and 21  
242 with RiVax<sup>®</sup> at optimal (1 µg; cohort 1) or sub-optimal (0.3 µg; cohort 2) doses. Serum samples  
243 were collected on day 30, and the mice were challenged on day 35 with 5 x LD<sub>50</sub> of RT  
244 administered by IP injection. Mice were then monitored for 7 days post-challenge for weight loss  
245 and morbidity, as described [38]. The results of each mouse in that experiment are presented in  
246 **Appendix 1.**

247 In cohort 1, 19 of the 20 vaccinated mice (95%) survived RT challenge, whereas in  
248 cohort 2 only 9 out of 20 survived (45%). As shown in **Figure 3**, pre-challenge, RT-specific EPT  
249 were significantly higher in mice that survived RT exposure (n=12), as compared to the  
250 decedents (median = 4.408 log<sub>10</sub> transformed EPT for the survivors vs. 3.204 for the decedents,  
251  $U = 72.50$ ,  $P = 0.0033$ , as determined by two-tailed Mann-Whitney  $U$  test). In terms of pre-  
252 challenge EPICC analysis, mice that survived RT challenge had significantly higher PB10  
253 (median = 29.4% inhibition for survivors vs. 9.8% for decedents,  $U = 65$ ,  $P = 0.0017$ ), SyH7  
254 (median = 10.2% for survivors vs. 4.95% for decedents,  $U = 97$ ,  $P = 0.0362$ ), and PH12 (median  
255 = 16.43% for survivors vs. 4.782 for decedents,  $U = 94$ ,  $P = 0.0286$ ) inhibition values as  
256 compared to the decedents. In contrast, EPICC values for IB2 ( $P = 0.1631$ ) and GD12 ( $P =$   
257  $0.6308$ ) were not significantly different between groups of mice that survived or died (**Figure 3**).

258 We next generated a series of univariate logistic regression models to further examine the  
259 relationships between survival and pre-challenge, RT-specific serum EPT and EPICC. Logistic  
260 regression demonstrated a significant relationship between EPT and survival ( $pP < 0.01$ ). For the  
261 EPICC analysis, inhibitory levels of each of the five RTA-specific mAbs was designated as the  
262 independent variable and death was designated as the dependent variable. For PB10 and SyH7,  
263 there was a significant correlation between EPICC values and survival, whereas for PH12, IB2,  
264 and GD12 there was not. To assess the predictive performance of the logistic regression models  
265 we employed ROC analysis. The models yielded AUC values of 0.7842 for EPT, 0.8065 for  
266 PB10 inhibition and 0.7113 for SyH7 inhibition. LASSO penalized logistic regression selected  
267 the optimal set of predictive variables as being EPT, combined with PB10 and SyH7 EPICC

268 inhibition values. Thus, combining EPT and EPICC values derived from PB10 or SyH7 was  
269 tentatively the most effective predictor of immunity to a lethal dose of injected RT.

270

271 *3.3 A multivariate model combining EPT and EPICC as a correlate of vaccine-mediated*  
272 *protection.*

273 We next examined a much larger cohort of mice (n=645) that had been uniformly  
274 vaccinated with RiVax<sup>®</sup> on days 0 and 21, and then challenged with a 5x LD<sub>50</sub> dose of RT on  
275 day 35 [22]. Serum samples were collected from the animals five days prior (day 30) to the  
276 challenge. Within this cohort, 374 mice survived ricin challenge and 271 died (**Appendix 2**).

277 In accordance with the preliminary study, RT-specific IgG titers in sera collected on day  
278 30 were higher in the mice that subsequently survived a lethal dose, as compared to mice that  
279 succumbed (median = 3.607 log<sub>10</sub> transformed EPT for survivors vs. 1.699 for decedents,  $U =$   
280 12245,  $P < 0.0001$ , as determined by two-tailed Mann-Whitney  $U$  test; **Figure 5A**). Similarly,  
281 EPICC revealed that mice that survived the challenge had significantly higher PB10 (median =  
282 41.95% inhibition for survivors vs. 3.244 for decedents,  $U = 17659$ ,  $P < 0.0001$ ) and SyH7  
283 inhibition values (median = 19.70% for survivors vs. 1.001% for decedents,  $U = 19069$ ,  $P <$   
284  $0.0001$ ), as compared to the decedents (**Figure 5 B,C**). Moreover, all 3 variables correlated with  
285 survival when examined in the single-variable models ( $P < 2e-16$  for all) (**Table 3; Figure 6**).  
286 The univariate EPT model had the highest AUC of the three (0.8792, 95% CI 0.8526-0.9057),  
287 followed by PB10 (0.8258, 95% CI 0.7939-0.8576) and SyH7 (0.8119, 95% CI 0.779-0.8447).  
288 The AUC values for PB10 and SyH7 were each significantly lower than the AUC derived  
289 from EPT (Holm-Šídák adjusted  $P < 0.05$ , as determined by Delong's test), demonstrating that  
290 when considering univariate analysis EPT is superior. However, a multivariate model  
291 considering EPT and EPICC for PB10 and SyH7 as predictive variables had a significantly  
292 higher AUC (0.901, 95% CI 0.8773-0.9246) than did EPT alone (Holm-Šídák adjusted  $P < 0.05$ )  
293 (**Table 3**). In summary, EPT and EPICC values for both PB10 and SyH7 have the potential to  
294 serve as co-correlates of vaccine-mediated protection of mice against RT with the term “co-  
295 correlate” being defined by Plotkin as “...a quantity of a specific immune response to a vaccine  
296 that is 1 of >2 correlates of protection and that may be synergistic with other correlates.” [23]

297

298 **4. Discussion**

299 In this report we investigated in a mouse model the potential of pre-challenge, RT-  
300 specific serum EPTs, as well as RTA epitope-specific antibody levels, to serve as CoP from  
301 lethal dose ricin toxin challenge, administered by injection. In both a pilot and larger cohort of  
302 mice, EPT emerged as having significant predictive value as a CoP. This finding unto itself  
303 constitutes an advance in the development of RiVax<sup>®</sup> considering that EPTs have never been  
304 formally been evaluated for its prognostic use with survival as an endpoint. By the same token,  
305 EPICC values derived using two mAbs, PB10 and SyH7, directed against different  
306 immunodominant toxin-neutralizing epitopes on RTA, were also significantly predictive of  
307 survival in the mouse model. Combining EPT and RTA-specific epitope reactivity, as  
308 determined by EPICC, ultimately provided the highest predictive power.

309 It should be noted that one advantage of the EPICC assay over direct competition  
310 ELISAs is that it is species neutral, because it relies on the detection of captured biotinylated  
311 ricin toxin using avidin-HRP, rather than using species-specific secondary reagents. This enables  
312 direct cross-species comparisons in pre-clinical testing. Another advantage is that EPICC  
313 involves the capture soluble antigen (RT), rather than detection of antigen immobilized on  
314 polystyrene microtiter wells. This is biologically significant because RT and its individual toxin  
315 subunits are partially denatured on plastic surfaces, resulting in the exposure of cryptic epitopes  
316 and possibly perturbation of native secondary structures.

317 We have recently initiated studies in Rhesus macaques to evaluate the bridging of  
318 potential of EPT and EPICCs as indicators of RiVax<sup>®</sup> -induced protection against RT. As alluded  
319 to above, it was previously demonstrated that Rhesus macaques that received three IM  
320 vaccinations with RiVax<sup>®</sup> (100 µg/dose) on days 0, 30, and 60 were protected against a 3 x LD<sub>50</sub>  
321 toxin challenge by aerosol on day 110 [18]. In that study, serum samples were assessed for RT-  
322 specific EPT, TNA, and preliminary competition ELISAs with a subset of RTA-specific mAbs,  
323 including PB10 and SyH7. However, establishing a CoP from that experiment alone was not  
324 possible considering that all animals survived ricin challenge (except for one that died from  
325 causes unrelated to toxin exposure). Nonetheless, that report and the work presented in **Figure 2**  
326 of this study bodes well for the applicability of EPICC to the NHP model, in that the four RT-  
327 neutralizing immunodominant epitopes on RTA identified in mice appear to be shared across  
328 species. Whether the specific EPICC profiles will translate across species is under evaluation. In  
329 our current study, PB10 and SyH7 inhibition values, representing epitope clusters I and II,

330 elicited following RiVax vaccination were predictive of survival. However, in preliminary  
331 analysis of NHP samples, IB2, representing cluster III, and not PB10 or SyH7 appear to correlate  
332 with protection (G. Van Slyke, D Ehrbar, C. Roy E. Vitetta, N. Mantis, unpublished results).

333 It should be noted that the conclusions drawn from our current study are limited to a  
334 single vaccination route (SC) and a single challenge route (IP). It is possible that specific CoPs  
335 for RT may depend on the site of vaccination and the mode of toxin exposure. Inhalation of RT  
336 triggers a particularly complex pathophysiology that results in acute lung injury (ALI) and acute  
337 respiratory distress syndrome (ARDS) involving multiple different cell types and inflammatory  
338 cytokines [43-45]. It is unclear where and how antibodies function to protect the lung against  
339 RT-induced damage, although a recent report from our group demonstrated that a humanized  
340 version of PB10 is sufficient, when given prophylactically by intravenous infusion, to protect  
341 Rhesus macaques against aerosolized ricin [31]. Thus, there are at least some parallels between  
342 rodents and NHPs, considering that PB10 has comparable toxin-neutralizing efficacy in mice as  
343 NHPs [46].

344 In summary, we have described a multivariate model combining EPT and EPICC values  
345 that affords high confidence in predicting survival of mice following a lethal challenge with RT.  
346 This model should facilitate the development of RiVax<sup>®</sup> as a MC for RT under the United States  
347 Food and Drug Administration's "Animal Rule."

348

### 349 **Acknowledgements**

350 The work described in this manuscript was supported by Contract No. HHSN272201400039C  
351 (to OD/RS; Soligenix, Inc.) and grant AI125190 (to NJM) from the National Institutes of Allergy  
352 and Infectious Diseases (NIAID), National Institutes of Health (NIH) and the Simmons-Patigian  
353 Chair (EV) at UT Southwestern. The content is solely the responsibility of the authors and does  
354 not necessarily represent the official views of the NIH. The funders had no role in study design,  
355 data collection and analysis, decision to publish, or preparation of the manuscript.

356

357 **Author Contributions (CRediT):** GVS, NJM: conceptualization; GVS, DJE, JW, and JY:  
358 investigation; GVS, DJE, DJV, EV, OD, NJM: formal analysis; GVS, DJE, NJM: writing  
359 original draft; EV, OD, NJM: writing, review and editing; NJM: Supervision and project  
360 administration.

361

362 **Declaration of Interest statement:** GVS, DJE, JW, JY, EV, and NJM declare no competing  
363 interests. OD is an employee of Soligenix, Inc. which holds the license for RiVax®.

364

## 365 **References Cited**

- 366 [1] De Groot AS, Moise L, Olive D, Einck L, Martin W. Agility in adversity: Vaccines on  
367 Demand. *Expert Rev Vaccines*. 2016;15:1087-91.
- 368 [2] Larsen JC, Disbrow GL. Project BioShield and the Biomedical Advanced Research  
369 Development Authority: A ten year progress report on meeting U.S. preparedness objectives  
370 for threat agents. *Clin Infect Dis*. 2017.
- 371 [3] Williamson ED, Duchars MG, Kohberger R. Predictive models and correlates of protection  
372 for testing biodefence vaccines. *Expert Rev Vaccines*. 2010;9:527-37.
- 373 [4] Approval of Biological Products When Human Efficacy Studies Are Not Ethical or Feasible
- 374 [5] Stark GV, Sivko GS, VanRaden M, Schiffer J, Taylor KL, Hewitt JA, et al. Cross-species  
375 prediction of human survival probabilities for accelerated anthrax vaccine absorbed (AVA)  
376 regimens and the potential for vaccine and antibiotic dose sparing. *Vaccine*. 2016;34:6512-7.
- 377 [6] Endo Y, Tsurugi K. RNA N-glycosidase activity of ricin A-chain. Mechanism of action of  
378 the toxic lectin ricin on eukaryotic ribosomes. *J Biol Chem*. 1987;262:8128-30.
- 379 [7] Lee MS, Tesh VL. Roles of Shiga Toxins in Immunopathology. *Toxins (Basel)*. 2019;11.
- 380 [8] Pittman PR, Reisler RB, Lindsey CY, Guereña F, Rivard R, Clizbe DP, et al. Safety and  
381 immunogenicity of ricin vaccine, RVEc, in a Phase 1 clinical trial. *Vaccine*. 2015;33:7299-  
382 306.
- 383 [9] Vance DJ, Mantis NJ. Progress and challenges associated with the development of ricin toxin  
384 subunit vaccines. *Expert Rev Vaccines*. 2016;15:1213-22.
- 385 [10] Vitetta ES, Smallshaw JE, Schindler J. Pilot phase IB clinical trial of an alhydrogel-  
386 adsorbed recombinant ricin vaccine. *Clin Vaccine Immunol*. 2012;19:1697-9.
- 387 [11] Carra JH, Wannemacher RW, Tammariello RF, Lindsey CY, Dinterman RE, Schokman  
388 RD, et al. Improved formulation of a recombinant ricin A-chain vaccine increases its stability  
389 and effective antigenicity. *Vaccine*. 2007;25:4149-58.
- 390 [12] McHugh CA, Tammariello RF, Millard CB, Carra JH. Improved stability of a protein  
391 vaccine through elimination of a partially unfolded state. *Protein Sci*. 2004;13:2736-43.

- 392 [13] Olson MA, Carra JH, Roxas-Duncan V, Wannemacher RW, Smith LA, Millard CB. Finding  
393 a new vaccine in the ricin protein fold. *Protein Eng Des Sel*. 2004;17:391-7.
- 394 [14] Smallshaw JE, Firan A, Fulmer JR, Ruback SL, Ghetie V, Vitetta ES. A novel recombinant  
395 vaccine which protects mice against ricin intoxication. *Vaccine*. 2002;20:3422-7.
- 396 [15] Smallshaw JE, Ghetie V, Rizo J, Fulmer JR, Trahan LL, Ghetie MA, et al. Genetic  
397 engineering of an immunotoxin to eliminate pulmonary vascular leak in mice. *Nat Biotechnol*.  
398 2003;21:387-91.
- 399 [16] Smallshaw JE, Richardson JA, Pincus S, Schindler J, Vitetta ES. Preclinical toxicity and  
400 efficacy testing of RiVax, a recombinant protein vaccine against ricin. *Vaccine*.  
401 2005;23:4775-84.
- 402 [17] McLain DE, Lewis BS, Chapman JL, Wannemacher RW, Lindsey CY, Smith LA.  
403 Protective effect of two recombinant ricin subunit vaccines in the New Zealand white rabbit  
404 subjected to a lethal aerosolized ricin challenge: survival, immunological response, and  
405 histopathological findings. *Toxicol Sci*. 2012;126:72-83.
- 406 [18] Roy CJ, Brey RN, Mantis NJ, Mapes K, Pop IV, Pop LM, et al. Thermostable ricin vaccine  
407 protects rhesus macaques against aerosolized ricin: Epitope-specific neutralizing antibodies  
408 correlate with protection. *Proc Natl Acad Sci U S A*. 2015;112:3782-7.
- 409 [19] O'Hara JM, Brey RN, 3rd, Mantis NJ. Comparative efficacy of two leading candidate ricin  
410 toxin a subunit vaccines in mice. *Clin Vaccine Immunol*. 2013;20:789-94.
- 411 [20] Smallshaw JE, Richardson JA, Vitetta ES. RiVax, a recombinant ricin subunit vaccine,  
412 protects mice against ricin delivered by gavage or aerosol. *Vaccine*. 2007;25:7459-69.
- 413 [21] Smallshaw JE, Vitetta ES. A lyophilized formulation of RiVax, a recombinant ricin subunit  
414 vaccine, retains immunogenicity. *Vaccine*. 2010;28:2428-35.
- 415 [22] Westfall J, Yates JL, Van Slyke G, Ehrbar D, Measey T, Straube R, et al. Thermal stability  
416 and epitope integrity of a lyophilized ricin toxin subunit vaccine. *Vaccine*. 2018;36:5967-76.
- 417 [23] Plotkin SA. Vaccines: correlates of vaccine-induced immunity. *Clin Infect Dis*.  
418 2008;47:401-9.
- 419 [24] Plotkin SA. Updates on immunologic correlates of vaccine-induced protection. *Vaccine*.  
420 2020;38:2250-7.

- 421 [25] Marconescu PS, Smallshaw JE, Pop LM, Ruback SL, Vitetta ES. Intradermal administration  
422 of RiVax protects mice from mucosal and systemic ricin intoxication. *Vaccine*. 2010;28:5315-  
423 22.
- 424 [26] Toth RTI, Angalakurthi SK, Van Slyke G, Vance DJ, Hickey JM, Joshi SB, et al. High-  
425 Definition Mapping of Four Spatially Distinct Neutralizing Epitope Clusters on RiVax, a  
426 Candidate Ricin Toxin Subunit Vaccine. *Clin Vaccine Immunol*. 2017;24.
- 427 [27] Vance DJ, Tremblay JM, Rong Y, Angalakurthi SK, Volkin DB, Middaugh CR, et al. High-  
428 Resolution Epitope Positioning of a Large Collection of Neutralizing and Nonneutralizing  
429 Single-Domain Antibodies on the Enzymatic and Binding Subunits of Ricin Toxin. *Clin*  
430 *Vaccine Immunol*. 2017;24.
- 431 [28] Noy-Porat T, Rosenfeld R, Ariel N, Epstein E, Alcalay R, Zvi A, et al. Isolation of Anti-  
432 Ricin Protective Antibodies Exhibiting High Affinity from Immunized Non-Human Primates.  
433 *Toxins (Basel)*. 2016;8.
- 434 [29] Rong Y, Pauly M, Guthals A, Pham H, Ehrbar D, Zeitlin L, et al. A Humanized Monoclonal  
435 Antibody Cocktail to Prevent Pulmonary Ricin Intoxication. *Toxins (Basel)*. 2020;12.
- 436 [30] Rong Y, Torres-Velez FJ, Ehrbar D, Doering J, Song R, Mantis NJ. An intranasally  
437 administered monoclonal antibody cocktail abrogates ricin toxin-induced pulmonary tissue  
438 damage and inflammation. *Hum Vaccin Immunother*. 2019:1-15.
- 439 [31] Roy CJ, Van Slyke G, Ehrbar D, Bornholdt ZA, Brennan MB, Campbell L, et al. Passive  
440 immunization with an extended half-life monoclonal antibody protects Rhesus macaques  
441 against aerosolized ricin toxin. *NPJ Vaccines*. 2020;5:13-.
- 442 [32] Sebaugh JL. Guidelines for accurate EC50/IC50 estimation. *Pharm Stat*. 2011;10:128-34.
- 443 [33] Chen L, Schiffer JM, Dalton S, Sabourin CL, Niemuth NA, Plikaytis BD, et al.  
444 Comprehensive analysis and selection of anthrax vaccine adsorbed immune correlates of  
445 protection in rhesus macaques. *Clin Vaccine Immunol*. 2014;21:1512-20.
- 446 [34] DeLong ER, DeLong DM, Clarke-Pearson DL. Comparing the areas under two or more  
447 correlated receiver operating characteristic curves: a nonparametric approach. *Biometrics*.  
448 1988;44:837-45.
- 449 [35] R\_Core\_Team. R: A language and environment for statistical computing. Vienna, Austria:  
450 R Foundation for Statistical Computing; 2014.

- 451 [36] Robin X, Turck N, Hainard A, Tiberti N, Lisacek F, Sanchez JC, et al. pROC: an open-  
452 source package for R and S+ to analyze and compare ROC curves. *BMC Bioinformatics*.  
453 2011;12:77.
- 454 [37] Friedman J, Hastie T, Tibshirani R. Regularization Paths for Generalized Linear Models via  
455 Coordinate Descent. *J Stat Softw*. 2010;33:1-22.
- 456 [38] Van Slyke G, Angalakurthi SK, Toth RT, Vance DJ, Rong Y, Ehrbar D, et al. Fine-  
457 Specificity Epitope Analysis Identifies Contact Points on Ricin Toxin Recognized by  
458 Protective Monoclonal Antibodies. *Immunohorizons*. 2018;2:262-73.
- 459 [39] Lemley PV, Amanatides P, Wright DC. Identification and characterization of a monoclonal  
460 antibody that neutralizes ricin toxicity in vitro and in vivo. *Hybridoma*. 1994;13:417-21.
- 461 [40] O'Hara JM, Neal LM, McCarthy EA, Kasten-Jolly JA, Brey RN, 3rd, Mantis NJ. Folding  
462 domains within the ricin toxin A subunit as targets of protective antibodies. *Vaccine*.  
463 2010;28:7035-46.
- 464 [41] Angalakurthi SK, Vance DJ, Rong Y, Nguyen CMT, Rudolph MJ, Volkin D, et al. A  
465 Collection of Single-Domain Antibodies that Crowd Ricin Toxin's Active Site. *Antibodies*  
466 (Basel). 2018;7.
- 467 [42] Derking R, Ozorowski G, Sliepen K, Yasmeeen A, Cupo A, Torres JL, et al. Comprehensive  
468 antigenic map of a cleaved soluble HIV-1 envelope trimer. *PLoS Pathog*. 2015;11:e1004767.
- 469 [43] Pincus SH, Bhaskaran M, Brey RN, 3rd, Didier PJ, Doyle-Meyers LA, Roy CJ. Clinical and  
470 Pathological Findings Associated with Aerosol Exposure of Macaques to Ricin Toxin. *Toxins*  
471 (Basel). 2015;7:2121-33.
- 472 [44] Sapoznikov A, Falach R, Mazor O, Alcalay R, Gal Y, Seliger N, et al. Diverse profiles of  
473 ricin-cell interactions in the lung following intranasal exposure to ricin. *Toxins (Basel)*.  
474 2015;7:4817-31.
- 475 [45] Sapoznikov A, Gal Y, Falach R, Sagi I, Ehrlich S, Lerer E, et al. Early disruption of the  
476 alveolar-capillary barrier in a ricin-induced ARDS mouse model: neutrophil-dependent and -  
477 independent impairment of junction proteins. *Am J Physiol Lung Cell Mol Physiol*.  
478 2019;316:L255-L68.
- 479 [46] Van Slyke G, Sully EK, Bohorova N, Bohorov O, Kim D, Pauly MH, et al. Humanized  
480 Monoclonal Antibody That Passively Protects Mice against Systemic and Intranasal Ricin  
481 Toxin Challenge. *Clin Vaccine Immunol*. 2016;23:795-9.



482

## 483 **Figure Legends**

484

485 **Figure 1. Spatial segregation of immunodominant neutralizing B cell epitopes on RTA, as**  
486 **determined by EPICC.** Cross competition ELISAs with indicated mAbs used as capture (y-  
487 axis) or competitor (x-axis) in solution with b-RT. The heatmap scheme indicates percent  
488 inhibition of competitor MAb, as compared to b-RT alone with inset numbers indicating percent  
489 reduction in a representative experiment. Negative values indicate enhancement of b-RT-in  
490 capture.

491

492 **Figure 2. EPICC analysis of antisera from rabbits and NHPs vaccinated with RiVax.**  
493 Pooled polyclonal sera from RiVax<sup>®</sup>-vaccinated (A) mice, (B) rabbits and (C) Rhesus macaques  
494 were subjected to EPICC with mAbs (see inset legends in first column) directed against RTA  
495 epitope clusters I, II, III and IV.

496

497 **Figure 3. Pilot study reveals EPT and EPICC as putative correlates of protection in a**  
498 **cohort of RiVax<sup>®</sup> vaccinated mice.** Female BALB/c mice (n=40) were vaccinated with  
499 suboptimal or near optimal doses of RiVax<sup>®</sup> (0.3 or 1 µg) at days 0 and 21 and challenged with  
500 10 x LD<sub>50</sub> RT on day 35. Sera was collected from mice on day 30 and analyzed by (A) indirect  
501 ELISA to determine EPT and (B-F) EPICC analysis. Statistical significance between survivors  
502 and decedents is denoted by an asterisk (unpaired t test; p < 0.02).

503

504 **Figure 4. EPT and EPICC values for SyH7 and PB10 as correlates of immunity to RT.**  
505 Results presented in Figure 3 were subjected to variable selection using LASSO penalized  
506 logistic regression. LASSO coefficient profiles were generated for all potential correlates of  
507 protection: EPT, PB10, SyH7, PH12, IB2 and GD12. Each curve corresponds to a potential  
508 predictive variable with coefficients plotted against the L1 Norm regularization term (lower x-  
509 axis). The upper x-axis depicts the number of nonzero coefficients at the respective  
510 regularization parameter.

511

512 **Figure 5. EPT and EPICC as putative correlates of protection in a large cohort of RiVax<sup>®</sup>**  
513 **vaccinated mice.** A cohort of 646 mice total vaccinated with RiVax<sup>®</sup> (dose range 0.3-3ug) on  
514 days 0 and 21 were challenged with RT on day 35, as reported in **Appendix 2**. Violin plots of  
515 pre-challenge serum samples examined for (A) EPT and (B-C) EPICC values with PB10 and  
516 SyH7. Statistical significance between survivors and decedents is denoted by an asterisk (Mann-  
517 Whitney test;  $p > 0.0001$ ).

518  
519 **Figure 6. ROC curve analysis of predictive performance of classifying variables in the large**  
520 **cohort.** Curves are based on univariate logistic regression models including the labeled variable.  
521 Area under the curve (AUC) values and corresponding 95% confidence intervals are included for  
522 each predictive variable.

523

524

## Tables

525

| <b>Cluster</b> | <b>MAb</b> | <b>K<sub>D</sub> (x 10<sup>-12</sup> M)<sup>a</sup></b> | <b>EC<sub>90</sub> (µg/ml)<sup>b</sup></b> |
|----------------|------------|---------------------------------------------------------|--------------------------------------------|
| I              | PB10       | 1.24                                                    | 0.1                                        |
|                | WECB2      | 3.10                                                    | 0.03                                       |
| II             | SyH7       | 20.3                                                    | 0.07                                       |
|                | PA1        | 9.19                                                    | 0.03                                       |
|                | PH12       | 9.10                                                    | 0.07                                       |
|                | TB12       | 44.2                                                    | 0.05                                       |
| III            | IB2        | 49.3                                                    | 0.25                                       |
| IV             | GD12       | 55.2                                                    | 0.25                                       |

<sup>a</sup>, apparent affinity of dissociation values from [26]; <sup>b</sup>, Derived from b-RT competition values;

526

527

528

| <b>Table 2. Logistic regression analysis of EPICC and endpoint titers</b> |                                  |                                  |                                 |                          |
|---------------------------------------------------------------------------|----------------------------------|----------------------------------|---------------------------------|--------------------------|
| <b>Variable</b>                                                           | <b>IEC<sup>a</sup> (P value)</b> | <b>VEC<sup>b</sup> (P value)</b> | <b>AUC<sup>c</sup> (95% CI)</b> | <b>LASSO<sup>d</sup></b> |
| PB10                                                                      | 0.74005 (0.2381)                 | -0.08322 (0.0102)                | 0.8065 (0.6729-0.9402)          | ●                        |
| SyH7                                                                      | 0.16697 (0.7656)                 | -0.12298 (0.0373)                | 0.7113 (0.5297-0.8929)          | ●                        |
| PH12                                                                      | -0.19418 (0.6786)                | -0.04827 (0.0812)                | 0.7202 (0.5441-0.8963)          |                          |
| GD12                                                                      | -0.79588 (0.0289)                | -0.01487 (0.6851)                | 0.5506 (0.3648-0.736)           |                          |
| IB2                                                                       | -0.35306 (0.3915)                | -0.02873 (0.0601)                | 0.6429 (0.4482-0.8375)          |                          |
| EPT                                                                       | 3.8963 (0.0405)                  | -1.2807 (0.0129)                 | 0.7842 (0.6435-0.9249)          | ●                        |

<sup>a</sup>IEC, Intercept estimated coefficient, <sup>b</sup>VEC, Variable estimated coefficient, <sup>c</sup>AUC, Area under the curve, <sup>d</sup>Variable selection by LASSO penalized logistic regression

529

| <b>Table 3. Model comparison as immune correlates of protection against RT in mice</b> |                 |                                  |                                  |                                 |                                                |
|----------------------------------------------------------------------------------------|-----------------|----------------------------------|----------------------------------|---------------------------------|------------------------------------------------|
| <b>Model</b>                                                                           | <b>Variable</b> | <b>IEC<sup>a</sup> (P value)</b> | <b>VEC<sup>b</sup> (P value)</b> | <b>AUC<sup>c</sup> (95% CI)</b> | <b>P value for AUC vs EP titer<sup>d</sup></b> |
| <b>SyH7</b>                                                                            |                 | 0.689023 (5.34e-09)              | -0.091457 (< 2e-16)              | 0.8119 (0.779-0.8447)           | <b>0.0004031</b>                               |
| <b>PB10</b>                                                                            |                 | 0.82242 (1.85e-11)               | -0.05578 (< 2e-16)               | 0.8258 (0.7939-0.8576)          | <b>0.0041451</b>                               |
| <b>log<sub>10</sub> EP titer</b>                                                       |                 | 2.78001 (<2e-16)                 | -1.17223 (<2e-16)                | 0.8792 (0.8526-0.9057)          | N/A                                            |
| <b>SyH7 + PB10</b>                                                                     | SyH7            | 1.118649 (2.76e-16)              | -0.058101 (3.15e-11)             | 0.8561 (0.8273-0.8849)          | 0.1047056                                      |
|                                                                                        | PB10            |                                  | -0.039627 (4.97e-15)             |                                 |                                                |
| <b>SyH7 + EP</b>                                                                       | SyH7            | 2.684511 (< 2e-16)               | -0.052147 (3.54e-09)             | 0.8938 (0.8692-0.9184)          | 0.0971708                                      |
|                                                                                        | EP              |                                  | -0.920670 (< 2e-16)              |                                 |                                                |
| <b>PB10 + EP</b>                                                                       | PB10            | 2.600741 (< 2e-16)               | -0.032372 (4.55e-10)             | 0.8933 (0.8682-0.9184)          | 0.1047056                                      |
|                                                                                        | EP              |                                  | -0.871628 (< 2e-16)              |                                 |                                                |
| <b>SyH7 + PB10 + EP</b>                                                                | SyH7            | 2.589035 (< 2e-16)               | -0.036901 (9.33e-05)             | 0.901 (0.8773-0.9246)           | <b>0.0135862</b>                               |
|                                                                                        | PB10            |                                  | -0.023665 (2.03e-05)             |                                 |                                                |
|                                                                                        | EP              |                                  | -0.778338 (4.58e-16)             |                                 |                                                |

<sup>a</sup>IEC: Intercept estimated coefficient, <sup>b</sup>VEC: Variable estimated coefficient, <sup>c</sup>AUC: Area under the curve, <sup>d</sup>Delong's test p value (Holm-Šidák adjusted) comparing AUC to that of log<sub>10</sub> transformed EP titer. Significant P values are bolded.

530

531

532

Figure 1

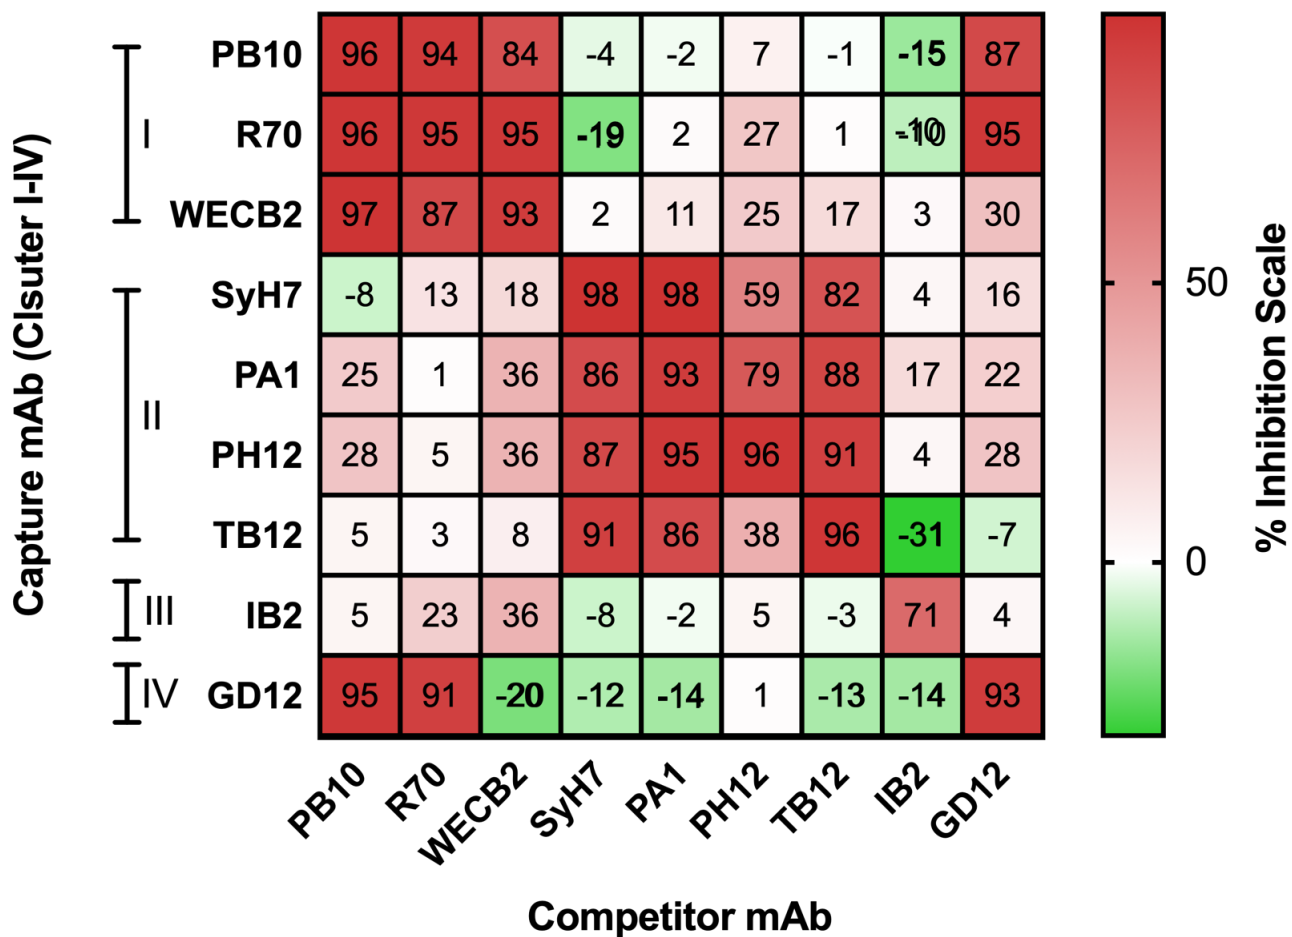

Figure 2

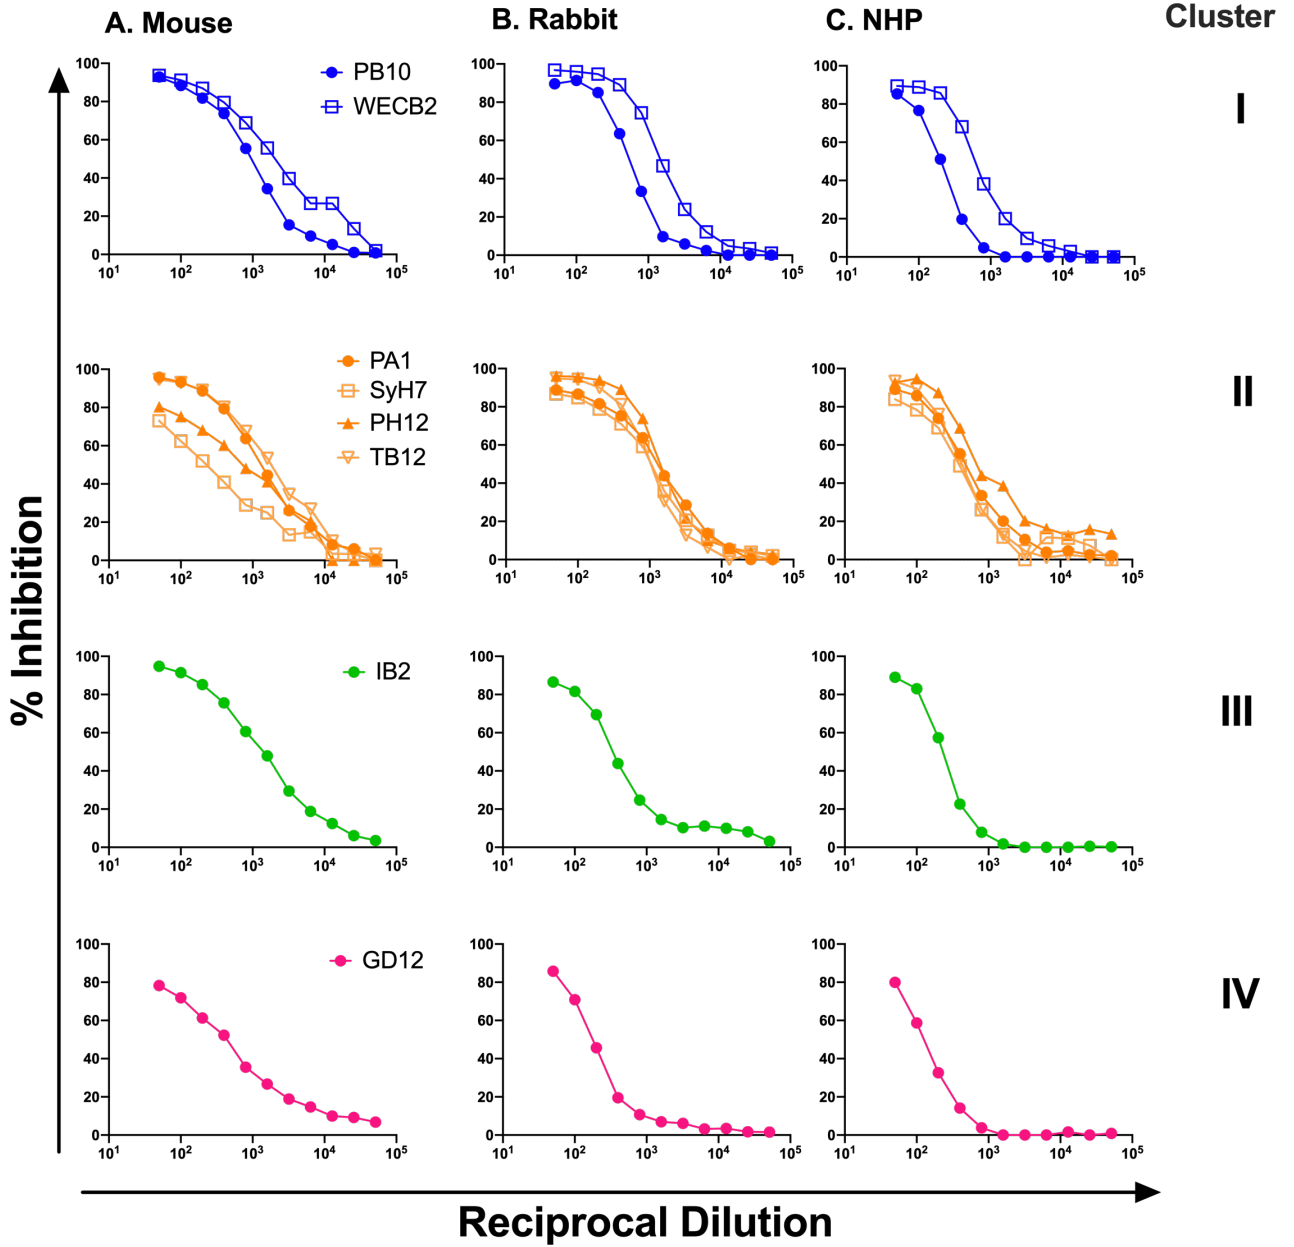

Figure 3

A. End-Point Titer

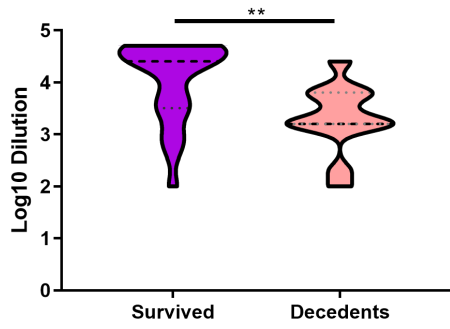

D. PH12

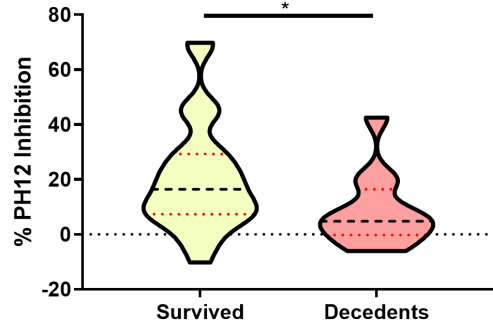

B. PB10

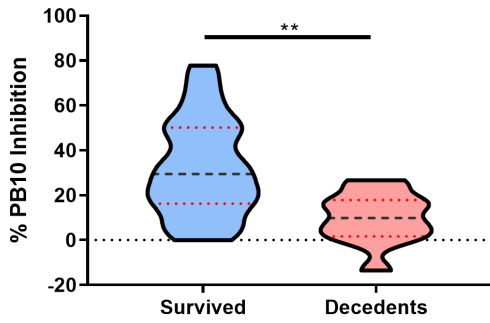

E. IB2

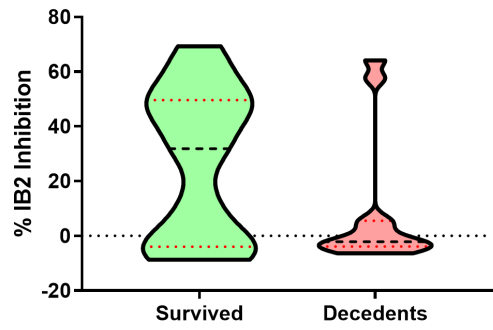

C. SyH7

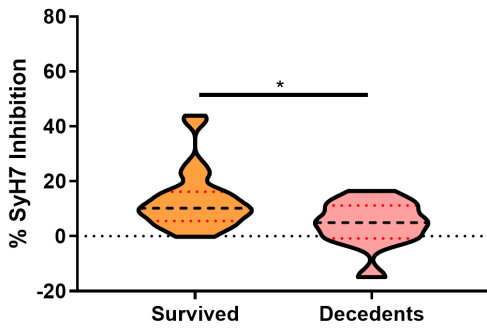

F. GD12

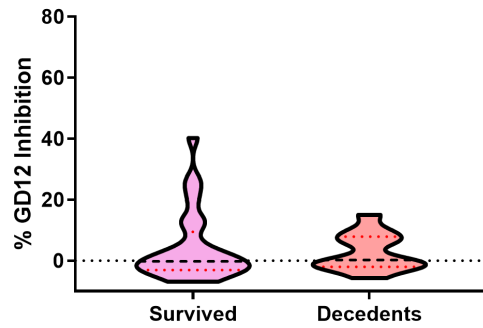



Figure 4

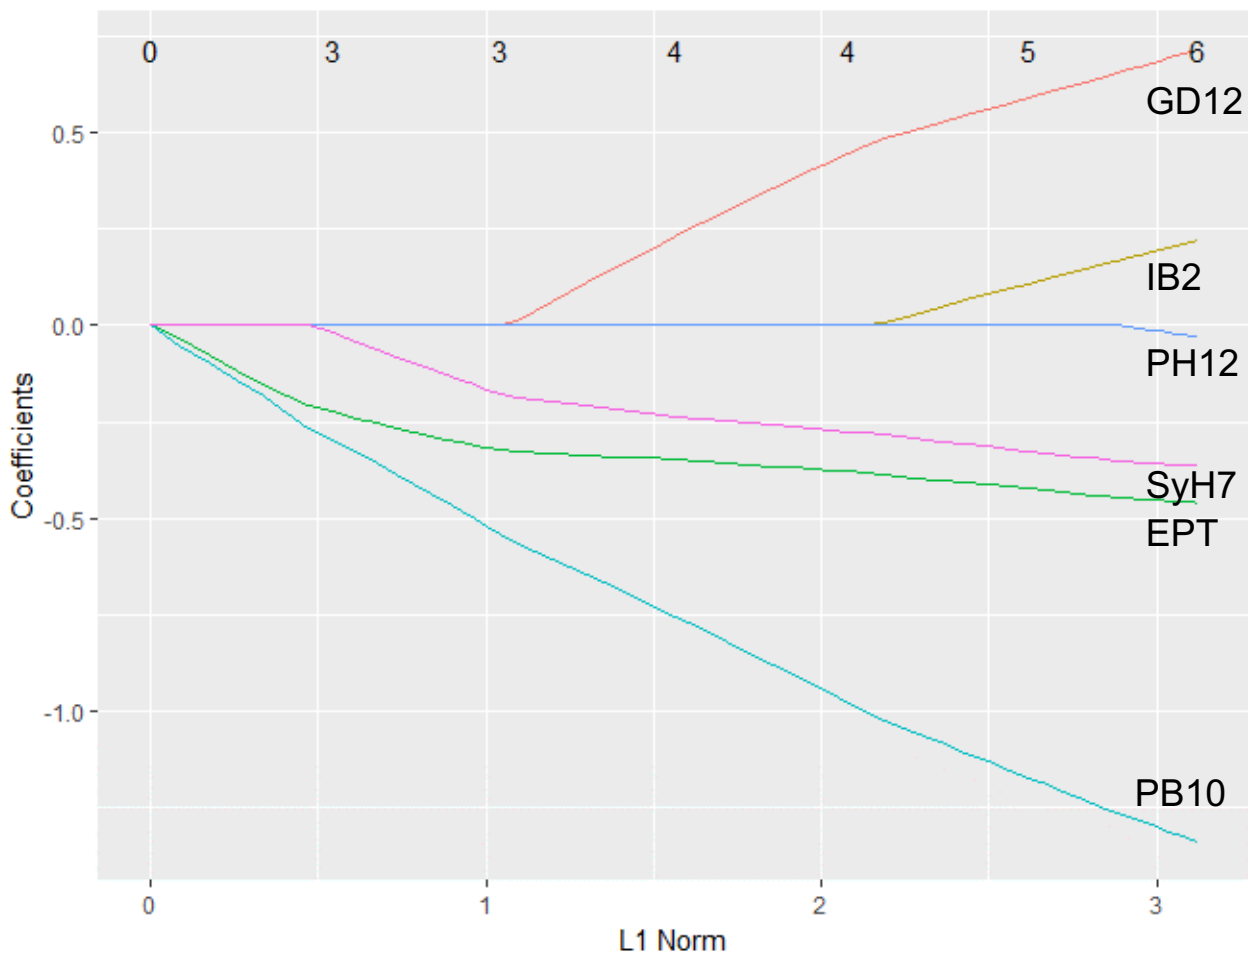

### A. End-Point Titer

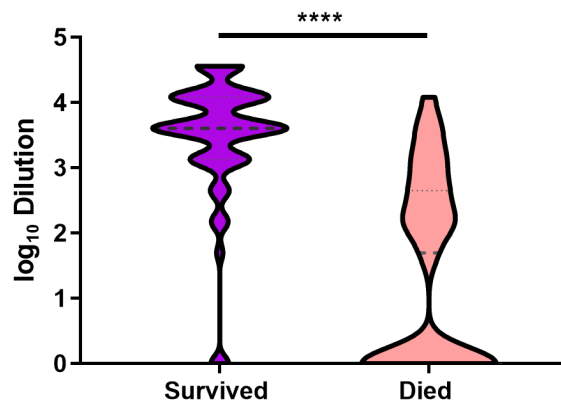

### B. PB10

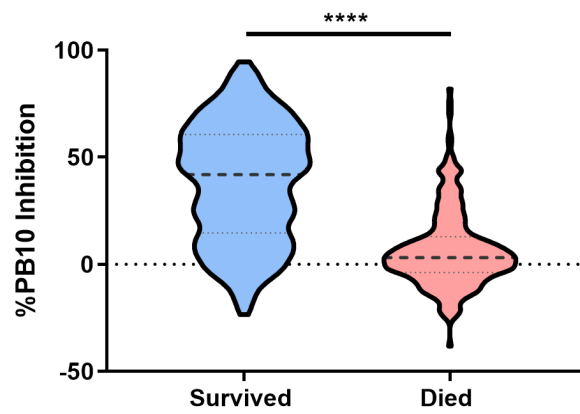

### C. SyH7

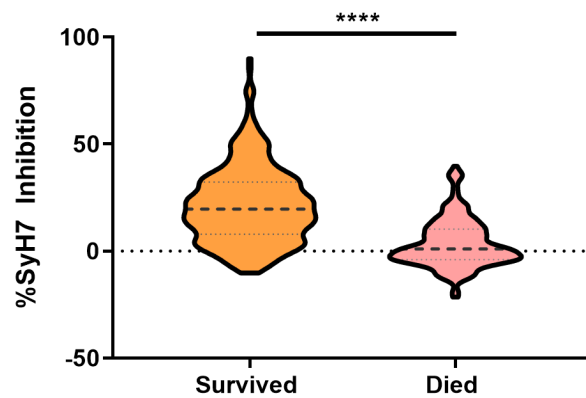

**Figure 6**

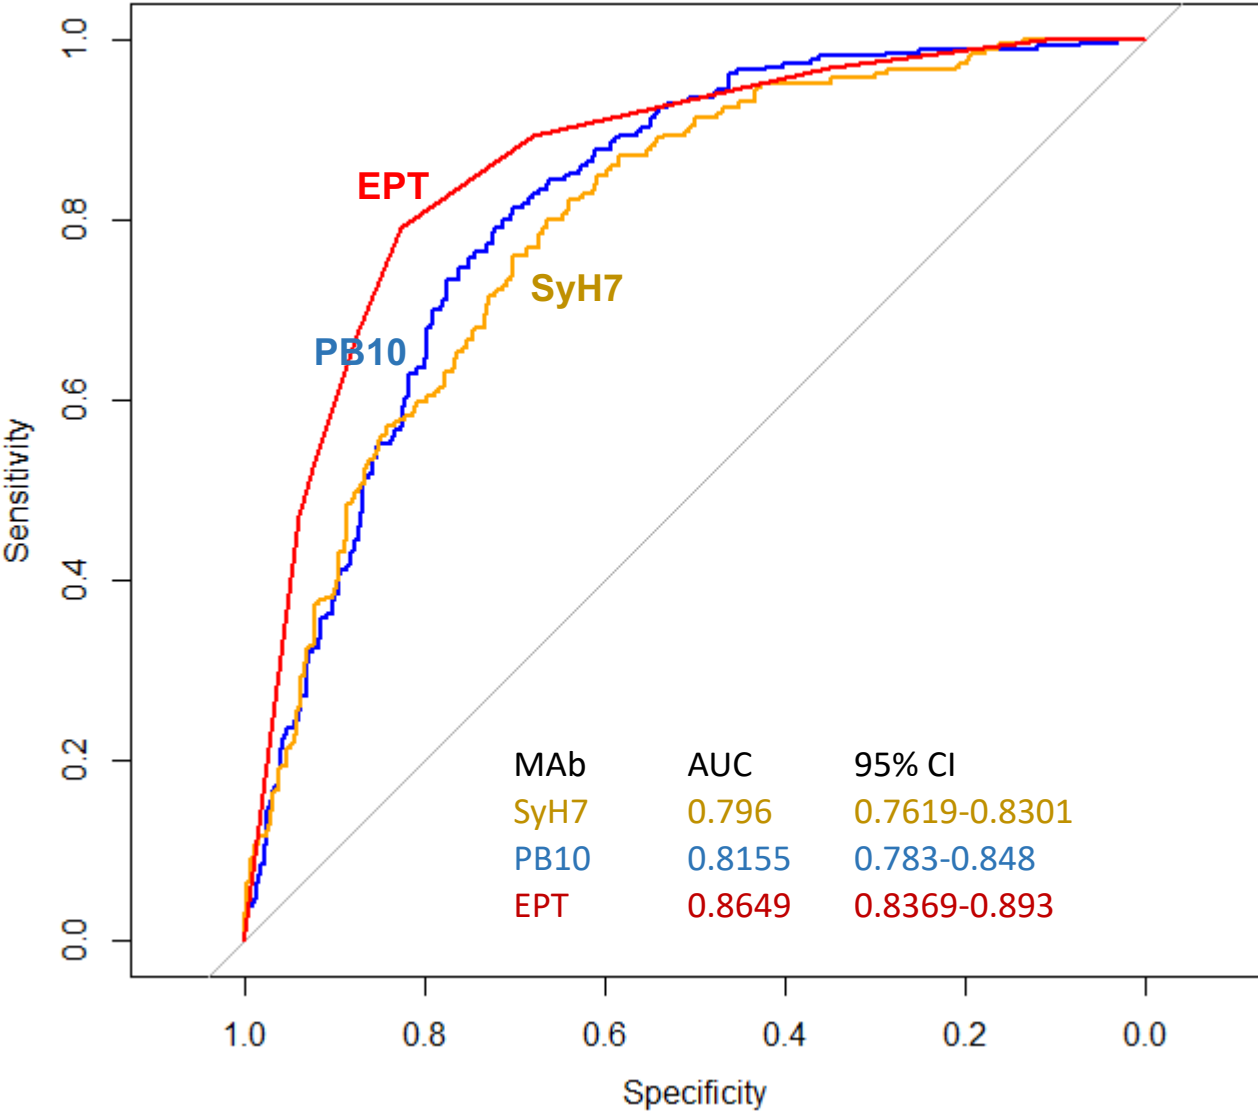

Source: https://www.biorxiv.org/content/10.1101/2020.05.06.081174v1.full.pdf
